# Effects of anoxia on ATP, water, ion and pH balance in an insect (*Locusta migratoria*)

Mathias V. Ravn<sup>1</sup>, Jacob B. Campbell<sup>2</sup>, Lucie Gerber<sup>1,3</sup>, Jon F. Harrison<sup>2</sup> and Johannes Overgaard<sup>1,\*</sup>

<sup>1</sup> Zoophysiology, Department of Bioscience, Aarhus University, 8000 Aarhus C, Denmark

<sup>2</sup> School of Life Sciences, Arizona State University, Tempe, AZ USA 85287

<sup>3</sup> Department of Ocean Sciences, Memorial University of Newfoundland, St. John's, A1C 5S7, Canada

\*Corresponding author email: [Johannes.overgaard@bios.au.dk](mailto:Johannes.overgaard@bios.au.dk)

**KEYWORDS:** Anoxia tolerance, anoxic stress, ion homeostasis, extracellular potassium, *L. migratoria*

## Abstract

When exposed to anoxia insects rapidly go into a hypometabolic coma from which they can recover when exposed to normoxia again. However, prolonged anoxic bouts eventually lead to death in most insects, although some species are surprisingly tolerant. Anoxia challenges ATP, ion, pH and water homeostasis, but it is not clear how fast and to what degree each of these parameters are disrupted during anoxia, nor how quickly they recover. Further, it has not been investigated which disruptions are the primary source of the tissue damage that ultimately causes death. Here we show, in the migratory locust (*Locusta migratoria*), that prolonged anoxic exposures are associated with increased recovery time, decreased survival, rapidly disrupted ATP and pH homeostasis and a more slowly disruption of ion ( $[K^+]$  and  $[Na^+]$ ) and water balance. Locusts could not fully recover after 4 hours of anoxia at 30 °C, and at this point hemolymph  $[K^+]$  and  $[Na^+]$  was elevated 5-fold and decreased 2-fold, respectively, muscle [ATP] was decreased to  $\leq 3\%$  of normoxic values, hemolymph pH had dropped 0.8 units from 7.3 to 6.5, and hemolymph water content was halved. These physiological changes are associated with marked tissue damage *in vivo* and we show that the isolated and combined effects of hyperkalemia, acidosis and anoxia can all cause muscle tissue damage *in vitro* to equally large degrees. When locusts were returned to normoxia after a moderate (2 hour) exposure of anoxia, ATP recovered rapidly (15 min) and this was quickly followed by recovery of ion balance (30 min), while pH recovery took 2-24 hours. Recovery of  $[K^+]$  and  $[Na^+]$  coincided with the animals exiting the comatose state, but recovery to an upright position took ~ 90 min and was not related to any of the physiological parameters examined.

## Introduction

Most biological processes in animals are fueled by the continuous ATP delivery from aerobic respiration. Oxygen availability is therefore critical for the ability of animals to function and survive and most animals die soon after they are exposed to anoxia (von Brand, 1946; Lutz and Nilsson, 1997; Boutilier, 2001). The sensitivity to anoxia is particularly high for endothermic vertebrates because their high metabolic demands quickly deplete internal energy stores (Wegener and Moratzky, 1995; Lutz and Nilsson, 1997). Humans, for example, cannot recover fully from 5-8 min of anoxia because cardiac and brain function is compromised shortly after aerobic ATP production ceases (Wegener and Moratzky, 1995; Lutz and Nilsson, 1997). Nevertheless, anoxia tolerance varies considerably among animal species and some species have evolved the ability to tolerate anoxia for prolonged periods (von Brand, 1946; Lutz and Nilsson, 1997; Bickler and Buck, 2007). Anoxia tolerant animals, such as painted turtle, crucian carp, brine shrimps (*Artemia*) and chironomid fly larvae, are all able to survive many months without oxygen, particularly at low temperature (von Brand, 1946; Hoback and Stanley, 2001; Jackson, 2002; Bickler and Buck, 2007). These extremely tolerant species are often characterized by large glycogen stores (Bickler and Buck, 2007) as well as depressed and/or modified energy metabolism that allows for increased reliance on anaerobic energy metabolism (Hoback and Stanley, 2001; Hochachka and Lutz, 2001; Bickler and Buck, 2007). Furthermore, extreme anoxia tolerance is universally associated with the ability to maintain cellular viability despite extreme metabolic depression (Hochachka, 1986; Hochachka and Lutz, 2001).

Terrestrial insects are obligate aerobes and are rarely considered among the most anoxia tolerant species. Nevertheless, many insects are endowed with considerable anoxia tolerance (von Brand, 1946; Hoback, 2012). This is somewhat surprising considering that small insects have a relatively high mass specific metabolic rate (Krogh and Weis-Fogh, 1951; Moratzky *et al.*, 1993). The migratory locust (*Locusta migratoria*), for example, has an aerobic resting metabolic rate of  $\sim 4.70 \text{ mL O}_2 \text{ kg}^{-1} \text{ min}^{-1}$  at  $20^\circ \text{C}$  (after Wegener and Moratzky, 1995). This is slightly higher than resting human metabolic rate of  $\sim 3.50 \text{ mL O}_2 \text{ kg}^{-1} \text{ min}^{-1}$  (Jetté *et al.*, 1990). However, locusts can recover after  $>4 \text{ h}$  of anoxia at  $20^\circ \text{C}$  which is impressive considering that humans only tolerate a few minutes of anoxia (Wegener and Moratzky, 1995). Similarly, at  $25^\circ \text{C}$ , adult *Drosophila melanogaster* survive  $>6 \text{ h}$  of anoxia and these insects have a resting normoxic metabolic rate of  $\sim 50 \text{ mL O}_2 \text{ kg}^{-1} \text{ min}^{-1}$  (after Callier *et al.*, 2015). Anoxia tolerances are often even more pronounced among the aquatic or semi-aquatic insects

who are also much more likely to experience hypoxia or anoxia in their natural habitats (von Brand, 1946; Hoback, 2012).

Many insects, but not all (e.g. fruitfly larvae, see Callier *et al.*, 2015), enter a neuromuscular coma when exposed to anoxia (Wegener, 1993; Rodgers *et al.*, 2010) and longer anoxic exposures reduce survival and increase the time it takes for insects to recover from anoxia (Wu *et al.*, 2002; Lighton and Schilman, 2007). The lack of aerobic ATP production disrupts ATP homeostasis causing ATP concentrations to drop rapidly (Wegener, 1993; Hoback, 2012; Campbell *et al.*, 2018). ATP concentrations tend to decrease even further with prolonged anoxia as has been shown in *L. migratoria* (Weyel and Wegener, 1996) and *D. melanogaster* (Campbell *et al.*, 2018). It has been suggested that anoxic mortality only occurs when ATP levels are close to zero and anoxic survival may therefore involve some ability to regulate/maintain ATP at low but nonzero level (Campbell *et al.*, 2018). The low ATP levels are likely to reduce the activity of ion-motive ATPases resulting in a gradual loss of ion homeostasis during anoxia. This is particularly problematic if extracellular  $K^+$  concentration rises (Rodgers *et al.*, 2010; Campbell *et al.*, 2018), as disrupted transmembrane  $[K^+]$  gradient leads to cell membrane depolarization which can initiate apoptotic or necrotic processes (Hochachka, 1986; Bortner *et al.*, 2001; Armstrong *et al.*, 2011; Bayley *et al.*, 2018). Elevated extracellular  $K^+$  has been observed in both brain (Armstrong *et al.*, 2011; Rodriguez and Robertson, 2012) and hemolymph (Campbell *et al.*, 2018) of anoxic *D. melanogaster*. Further, it is likely that the continued reliance on anaerobic metabolism causes severe acidification as has been demonstrated in hemolymph of *D. melanogaster* (Campbell *et al.*, 2018). This anaerobic acidosis is another possible source of anoxic injury (Storey and Storey, 1990) and it is also possible that injury is linked to oxidative damage, particularly during re-oxygenation upon recovery from anoxia (Hermes-Lima *et al.*, 2015; Moreia *et al.*, 2016).

Despite differences in tolerances, almost all animals will inevitably die if exposed to continuous anoxia. Yet, it is still not understood how depletion of energy stores, loss of homeostasis or accumulation of toxic waste products contribute to cell damage and death in insects (Moratzky *et al.*, 1993; Harrison *et al.*, 2017). Anoxic cell injury and death can in theory be a consequence of an extracellular  $K^+$  surge and its associated membrane depolarization (Bayley *et al.*, 2018). It may also be linked to acidification of tissues from extended anaerobiosis. Other downstream responses of ATP depletion may also contribute to anoxic injury (such as damage on proteins, disruption of osmotic homeostasis or excessive formation of reactive oxygen species (ROS) during re-oxygenation) (Harrison *et al.*, 2017; Bergamini *et al.*, 2004; Hermes-Lima *et al.*, 2015; Lighton and Schilman, 2007). Several of these detrimental

processes occur simultaneously and it is therefore possible that these factors act additively to cause anoxic injury. To understand how disruption of ATP, ion, water, and pH homeostasis are linked to anoxic injury and loss of function in insects the present study examines the effects of anoxic exposure and recovery on animal performance and *in vivo* ATP, ion, water and pH homeostasis. In addition, we investigate, for the first time, if anoxia causes cellular damage *in vivo* in muscle tissue, and we examine *in vitro* if injury is a result of the isolated or combined effects of hyperkalemia, acidosis and anoxia.

## Materials and methods

### Animals

All experimental animals used in this study were adult *Locusta migratoria* aged 1-4 weeks post final ecdysis. The animals were purchased from a commercial supplier (Peter Andersen Aps, Fredericia, Denmark) as 5<sup>th</sup> instar nymphs and housed in a ventilated 0.45 m<sup>3</sup> container with metal mesh and egg trays for hiding and molting. Room temperature was set to 25 °C and locusts were kept under a daily 16:8 h light:dark cycle. During light hours, animals had access to a heating lamp creating a temperature gradient (from 25 to ~ 45 °C) and allowing behavioral thermoregulation. Animals were fed fresh wheat sprouts daily and had *ad libitum* access to wheat bran and water. Females and males were used in a 1:1 ratio in all experiments and data from both sexes were pooled as no sex differences were observed.

### Experimental protocol

Experiments were designed to investigate the effects of anoxia on animal performance (recovery time and recovery score), ion balance (intra- and extracellular [Na<sup>+</sup>] and [K<sup>+</sup>]), water balance (hemolymph volume), energy balance ([ATP]), and pH balance (hemolymph pH). The physiological measurements were made in separate experimental series in animals exposed to anoxia at 30 °C for either 0, 0.25, 0.5, 1, 2, 3, or 4 h and in animals that had recovered in normoxia for 0, 0.25, 0.50, 1, 2 or 24 h following a 2 h anoxic exposure.

On the day of the experiments, locusts were placed in glass jars (760 mL) with metal lids. The jars were placed in an incubator set at 30 °C and each jar was connected to a RM-8 Flow Multiplexer (Sable Systems, USA) that allowed for sequential flow of pure nitrogen (N<sub>2</sub>) to 8 individual jars. To minimize desiccation of experimental animals, the gas was hydrated using a gas wash bottle filled with water and a humidified tissue paper was placed in each glass jar. Anoxic conditions in a jar was always initiated by 10 min of constant high flow rate of N<sub>2</sub> to

ensure quick purge of the original gas (room air) from the jars. The flow was not measured but anoxic coma was always induced in  $\leq 3$  min. After the initial “purging phase” each jar was flushed at regular intervals (typically for 1 min every 5 min) thereby assuring that all jars remained anoxic. Control animals were kept in an incubator at 30 °C in a small cage with no food for 1 h before sampling. For experiments involving recovery (except for the experiment assessing recovery time and performance score; see below), animals were moved from the glass jars and allowed to recover at 20-22 °C in normoxia for up to 2 h with no access to food and water. However, locusts that recovered for 24 h were kept at 30 °C for the remaining 22 h and during this time the animals had access to both water and wheat bran *ad libitum*.

### **Anoxic coma recovery time and performance score**

Recovery time and performance score were used to assess the effects of anoxia on animal performance. After anoxic exposures (N=8 per treatment), locusts were observed for up to 3 h where the time to first movement and time to standing was noted for each individual. Locusts were stimulated during this recovery period by gently blowing air onto them every minute. After standing, or the 3 h had passed, locusts were placed in small cages at 30 °C with *ad libitum* access to water and wheat bran. Twenty-four hours after the anoxic exposure a performance score was obtained for each animal by scoring the animals from 0-5 (0 = no observable movements (dead), 1 = any observable movement, 2 = able to stand, 3 = able to walk, 4 = able to jump, and 5 = able to fly).

### **ATP balance**

Concentrations of ATP was measured in femur muscle tissue sampled during anoxic exposure and following recovery. All anoxic samples were prepared inside an airtight glove bag filled with nitrogen (Aldrich AtmosBag Z564451, Merck KGaA, Darmstadt, Germany). Samples were taken in a 30 °C room and the glove bag was flushed with nitrogen several times to ensure that the samples did not come in contact with oxygen during the sampling procedure. The glove bag was equipped with inlet ports for gas in- and outflow as well as electrical wires for instruments (i.e. the weight and tissuelyser was placed in the glove bag during sampling). Samples taken during the recovery period were prepared at 20-22 °C in normoxia.

Muscle samples were collected (inside the glove bag) by cutting off the hindlegs below the coxae and squeezing the femur muscle tissue out with forceps. Muscle tissue was gently blotted on *Kimwipes* to remove residual hemolymph before it was transferred to a pre-weighed

2 mL microcentrifuge tube and weighed. A 40  $\mu$ L homogenization buffer (6M guanidine HCl, 100mM Tris (pH 7.8), and 4mM EDTA) was added for each mg muscle together with a stainless-steel bead. This chaotropic buffer ensured stabilization of all adenylates and the tube containing muscle, buffer and stainless-steel bead was frozen in liquid nitrogen. After sampling, the frozen tubes were placed in a TissueLyser LT (Qiagen, Hilden, Germany) and homogenized at 50 Hz while they were thawing. Samples remained cold until complete homogenization (typically 5-10 min) and were then returned to liquid nitrogen before leaving the anoxic glove for storage at -80 °C.

Later, all samples were warmed to 100 °C (with closed lids to avoid evaporation) for 5 min after which they were centrifuged at 14,000 g for 3 min in a 4 °C centrifuge (3-18 K, Sigma, Osterode am Harz, Germany). Samples of supernatant were then returned to -80 °C until measurements of ATP. ATP was quantified using a bioluminescent assay (Molecular Probes #A22066, Eugene, OR, USA) as described by Campbell *et al.* (2018).

### Ion balance

Extracellular concentration of  $K^+$  and  $Na^+$  ( $[K^+]_o$  and  $[Na^+]_o$ ) were estimated from hemolymph sampled during anoxia or following recovery (N=7-8 per treatment). Hemolymph samples (>5  $\mu$ L) were obtained with a 25  $\mu$ L capillary from the cervical membrane. If insufficient, additional hemolymph volume was collected from the hindlegs. 5  $\mu$ L hemolymph was then pipetted from the capillary tube to a 2 mL microcentrifuge tube containing 2 mL 100 ppm  $Li^+$  buffer (Sherwood Scientific Ltd, Cambridge, UK) for later determination of ion composition by flame photometry (Model 420, Sherwood Scientific Ltd, Cambridge, UK). Measurements were referenced to standards of known concentrations.

Intracellular concentration of  $K^+$  and  $Na^+$  ( $[K^+]_i$  and  $[Na^+]_i$ ) were estimated from measurements of muscle samples during anoxia or following recovery (N=7-8 per treatment). Collection of femur muscle tissue was performed using the same procedure as for adenine nucleotides measurements. After muscle collection, the muscles were dried for 24 h at 58 °C.  $[K^+]_i$  and  $[Na^+]_i$  was determined by lysing dried muscle tissues in 200  $\mu$ L Milli-Q water using a stainless-steel bead and a tissueLyser at 50 Hz for 10 min. The samples were then centrifuged at 10,000 g for 10 min (3-18 K, Sigma, Osterode am Harz, Germany) and 20 and 5  $\mu$ L of supernatants were placed in 2 mL 100 ppm  $Li^+$  buffer for later determination of  $[Na^+]_i$  and  $[K^+]_i$ , respectively. Concentrations were corrected according to the assumption that muscle



tissues contain a 4% residual hemolymph volume (after MacMillan *et al.*, 2012), using the following equation:

$$\text{Corrected } [X]_i = \frac{[X]_i - (0.04 \cdot [X]_o)}{0.96},$$

where  $[X]_i$  is the concentration of a specific ion measured in the muscle tissue, and  $[X]_o$  is the concentration of a specific ion measured in hemolymph of that animal.

### Water balance

Organismal water balance was estimated gravimetrically by weighing locusts before and after withdrawal of its hemolymph (N=7-8). Hemolymph was withdrawn from the cervical membrane and hindlegs as described above. When no further hemolymph could be withdrawn the animals were opened with a ventral incision and the body cavity was gently and quickly blotted with filter paper (Filter Paper Type 138, Hounisen, Stilling, Denmark) to remove any remaining hemolymph. The total duration of this extraction was  $\leq 1$  min after which the “hemolymph free” animal was reweighed. This method gave water contents comparable with a previously used inulin method in *L. migratoria* (O’Sullivan *et al.*, 2017). Muscle water content was determined by comparing wet and dry mass of muscles from intracellular ion concentration measurements (N=7-8 per treatment). To determine gut water content, the entire gut (from the esophagus to the rectum) of the “hemolymph free” animal was dissected out. Fatty tissues, connective tissues, Malpighian tubules, tracheal tubes, air sacs but not gastric ceca around the gut were cautiously removed with forceps beforehand. Guts were transferred to pre-weighed 2 mL microcentrifuge tubes while avoiding spillage of gut contents from either end. Total sampling time per locust was  $\sim 15$  min. The wet mass was then determined, and the guts were dried at 58 °C for 4-5 days before measurement of dry mass and calculation of fractional gut water content.

### pH balance

Hemolymph pH was measured using ion-selective micro-electrodes (ISME) during anoxic exposure or following recovery from anoxia (N=8-10). Hemolymph was sampled as described above and a 5  $\mu$ L droplet of hemolymph was placed underneath a layer of hydrated paraffin oil in a petri dish. Electrodes were constructed using borosilicate glass capillaries (TW150-4, World Precision Instruments (WPI), Sarasota, FL, USA). Capillaries were pulled with an electrode puller (PC-84 Sachs-Flaming Micropipette Puller, Sutter Instruments, Novato, CA USA) to form a  $\sim 3$   $\mu$ m tip. Afterwards, ISMEs were silanized in N,N-



dimethyltrimethylsilylamine vapors for 1 h at 300 °C. Electrodes were then backfilled with 40 mM KH<sub>2</sub>PO<sub>4</sub>, 15 mM NaCl, 23 mM NaOH, pH 7.0 and front-filled with an H<sup>+</sup>-selective ionophore (H<sup>+</sup> Ionophore I/Cocktail B, Sigma Aldrich, St. Louis, MO, USA) (Lee *et al.*, 2013). The tips of the electrodes were then dipped in a PVC-solution with 10 mg PVC dissolved in 3 mL tetrahydrofuran to prevent displacement of the ionophore when inserted in paraffin oil. A glass reference electrode (1B100F-4, WPI) filled with 500 mM KCl was prepared to complete the electrical circuit. The voltage between the electrodes were recorded with a differential electrometer (FD223a, WPI) and a MP100A data acquisition system coupled to a computer running AcqKnowledge software (Biopac Systems, Goleta, CA, USA). Calibration of the ISME was done with calibration solutions at pH-values of 6, 7, and 8. The 10-fold concentration differences in [H<sup>+</sup>] of these calibration solutions allows to convert recordings of voltages to [H<sup>+</sup>] using the formula:

$$[H^+]_o = [H^+]_c \cdot 10^{\frac{\Delta V}{S}}$$

Where [H<sup>+</sup>]<sub>o</sub> is the [H<sup>+</sup>] in the hemolymph sample, [H<sup>+</sup>]<sub>c</sub> is the [H<sup>+</sup>] in the appropriate calibration solution, ΔV is the recorded voltage between the calibration solution and the hemolymph, and S is the slope of the recorded voltage between two calibration solutions with 10-fold differences in [H<sup>+</sup>]. Measurements were only utilized if the electrodes generated slopes between 50 and 62 mV per log [H<sup>+</sup>] change, as predicted by the Nernst relationship.

### Tissue damage

Tissue damage was estimated in muscle tissue as described by MacMillan *et al.* (2015a). Here, an *in vivo* and an *in vitro* experiment was performed. *In vivo* experiments were performed to estimate tissue damage in locusts exposed to anoxia for 4 h while *in vitro* experiments were conducted on semi-intact locusts incubated in modified buffers (see Table 1). These *in vitro* experiments were performed to estimate tissue damage by the combined and isolated effects of anoxia, acidosis and hyperkalemia.

In the *in vivo* experiment, locusts were either exposed to anoxia or normoxia for 4 h at 30 °C before dissection (N=5-6). After the treatments, locusts had their head, legs, wings, guts, and ovaries/testes removed before being placed in a petri dish filled with 50 mL of buffer at 20-22 °C. Control animals were placed in a buffer mimicking normoxic hemolymph composition (in mM: 110 NaCl, 8 KCl, 3 CaCl<sub>2</sub>, 2 MgCl<sub>2</sub>, 1 NaH<sub>2</sub>PO<sub>4</sub>, 90 sucrose, 5 glucose, 5 trehalose, 1 proline, 10 MOPS, pH 7.3; see Table 1) (modified from MacMillan *et al.*, 2015a), while anoxic animals were placed in a modified buffer mimicking hemolymph composition

after 4 h of anoxia (in mM: 78 NaCl, 40 KCl, 3 CaCl<sub>2</sub>, 2 MgCl<sub>2</sub>, 1 NaH<sub>2</sub>PO<sub>4</sub>, 90 sucrose, 5 glucose, 5 trehalose, 1 proline, 10 MOPS, pH 6.5; see results). For this buffer we only changed pH to mimic lactic acidosis, although lactate could possibly also influence the process involved in anoxic tissue damage. The mesothoracic posterior tergocoxal muscle (M90; Snodgrass, 1929) was used for these studies as it is easy to isolate without substantial mechanical damage. The muscle was exposed by carefully removing fatty tissues and trachea, and the muscle was then dissected out with micro scissors and placed onto a glass slide to stain live and dead cells using the LIVE/DEAD Sperm Viability Kit (Thermo Fisher Scientific, Waltham, MA, USA) previously described by Yi and Lee (2003). Briefly, the muscles were incubated for 13 min in 35  $\mu$ L of the appropriate buffer (i.e. used for dissection) containing 38  $\mu$ M SYBR 14 (staining live cells in green), after which 35  $\mu$ L buffer containing 60  $\mu$ M propidium iodide (staining dead cells in red) was added before the muscle incubated in this buffer for 10 minutes. After the total 23 min incubation time, a glass coverslip was gently placed onto the muscle, and imaging was carried out as described by MacMillan *et al.* (2015a). Imaging of the muscle was performed through a Zeiss Axio Imager A2 fluorescence microscope (Carl Zeiss AG, Oberkochen, Germany). To visualize live cells with DNA-bound SYBR 14 (excitation  $\lambda_{\text{max}}$ : 475 nm, emission  $\lambda_{\text{max}}$ : 516 nm) a filter for FITC was used (excitation  $\lambda$ : 450–490 nm, emission  $\lambda$ : 515–565 nm), and to visualize dead cells with DNA- and RNA-bound propidium iodide (excitation  $\lambda_{\text{max}}$ : 535 nm, emission  $\lambda_{\text{max}}$ : 617 nm) a filter for rhodamine was used (excitation  $\lambda$ : 534–568 nm, emission  $\lambda$ : 575–640 nm).

Analysis of images was performed with the Fiji distribution of ImageJ as described by MacMillan *et al.* (2015a) with 600 $\times$ 600 pixels subsamples. Individual green and red images were converted to greyscale, and live and dead cell nuclei were isolated from the background using the automatic threshold function. Cell viability was found by counting the number of live and dead cells using the particle analysis function. The automated counting was validated by comparison with manual counting on a random subset of images. In few cases the automatic threshold did not work, and manual threshold was used instead.

*In vitro* experiments were performed with semi-intact locusts as described by MacMillan *et al.* (2015a). All treatments were carried out at 30 °C for 4 h with semi-intact locust preparations (e.g. without head, legs, wings, guts and ovaries/testes). Semi intact locusts were then incubated in 50 mL of modified hemolymph buffers to mimic physiological anoxia, acidosis and/or hyperkalemia (see Table 1 for overview of buffers). Buffers for hyperkalemia, anoxia and acidosis were made by increasing the buffer [K<sup>+</sup>] (and decreasing [Na<sup>+</sup>] to maintain osmolality), bubbling with a steady flow of N<sub>2</sub> and decreasing the buffer pH to 6.5,

respectively. As mentioned above we only changed pH to mimic lactic acidosis, although lactate could possibly also influence the process involved in anoxic tissue damage.

Treatments with the combined effects used buffers with high  $K^+$  and low pH and had a steady nitrogen flow (same as anoxic buffer used for the *in vivo* experiment). Control locusts were incubated in control buffer (same as control buffers used for the *in vivo* experiment). In all treatments, buffers were prewarmed to 30 °C and bubbled with either  $N_2$  or  $O_2$  before use. All non-anoxic treatments had a steady oxygen gas flow. Subsequent dissection, staining, imaging, and image analysis was executed following the same procedures as described above for the *in vivo* experiments.

## Statistical analysis

Statistical analysis was performed in R (version 3.4.1). Effects of anoxic exposure and recovery on recovery time, ATP, ion concentrations, water content and pH were analyzed with one-way ANOVAs where significant differences between treatment groups were identified using a *post-hoc* Tukey's HSD. Furthermore, a *post-hoc* Dunnett's test was used in experiments evaluating the effects of recovery from anoxia to see when conditions had recovered to control conditions. The effect of anoxic exposure on performance scores were analyzed with a Kruskal–Wallis test where significant differences between treatment groups were identified using a *post-hoc* multiple comparisons test using the `kruskalmc()` function in the `pgirmess` package. Effects of different treatments on tissue damage were analyzed with one-way ANOVAs with *post-hoc* Tukey's HSD to identify statistical significances. All results are presented as means  $\pm$  s.e.m and all statistics are related to a  $P < 0.05$  level of significance.

## Results

### Anoxic coma recovery time and performance score

When locusts were exposed to anoxia they quickly entered a comatose state, however if they were returned to normoxia after short periods of anoxia they recovered rapidly (Fig. 1A). Following 15 min of anoxia it took the locusts  $3.5 \pm 0.47$  min to make their first movement and  $17.7 \pm 1.49$  min before they had returned to an upright position. As expected, recovery time increased with prolonged anoxic exposures ( $F_{5,42}=33.98$ ,  $P < 0.001$  for time to first movement;  $F_{3,28}=47.53$ ,  $P < 0.001$  for time to standing). Thus, after 4 h of anoxia locusts made their first movement after  $67.4 \pm 9.29$  min and locusts that had been exposed to  $\geq 3$  h of anoxia were unable to recover to a standing position within the 3 h observation time.

Anoxic exposure time also had a clear and significant effect on survival and performance when the animals were examined 24 h after they had returned to normoxia (Kruskal-Wallis;  $\chi^2=39.2$ ,  $P<0.001$ ; Fig. 1B). Thus, locusts exposed to less than  $\leq 30$  min of anoxia scored 5, the highest score on the performance scale (0-5, see methods). One hour of anoxia resulted in a non-significant tendency for the score to decrease, and the score was lower than control after 3 h of exposure (score of  $2.25\pm0.31$ ). After 4 h of anoxia all animals had a score of either 1 (movement but not standing) or 0 (dead) (average =  $0.63\pm0.18$ ).

### ATP balance

Muscle ATP concentrations decreased quickly and dramatically during anoxia ( $F_{6,33}=45.48$ ,  $P<0.001$ ; Fig. 2). Muscle ATP concentration were reduced by  $\sim 40\%$  after 15 min exposure, and this depletion continued steadily until the 2 h of exposure after which ATP was almost fully depleted with a concentration of less than 3 % of control values.

Recovery in normoxia after 2 h of anoxia had a significant effect on muscle ATP levels ( $F_{5,30}=80.83$ ,  $P<0.001$ ) and was characterized by an extremely rapid ATP recovery (Fig. 2). Thus, locusts had completely recovered ATP concentration at our first measurement 15 min after the return to normoxia.

### Ion balance

The changes in ion concentration in muscle tissues were generally small during anoxic coma (Fig. 3A and B). There was a slight increase in  $[\text{Na}^+]_i$  which was significantly higher than control values after 4 hours of anoxia ( $F_{6,49}=2.548$ ,  $P=0.032$ ; Fig. 3A) while muscle  $[\text{K}^+]_i$  remained at control levels during the entire anoxic exposure ( $F_{6,49}=0.666$ ,  $P=0.677$ ; Fig. 3B). The changes in hemolymph ion concentration were much more extensive and were characterized by a significant decrease in  $[\text{Na}^+]_o$  ( $F_{6,49}=18.19$ ,  $P<0.001$ ; Fig. 3C) and a large increase in  $[\text{K}^+]_o$  ( $F_{6,49}=134.1$ ,  $P<0.001$ ; Fig. 3D).  $[\text{Na}^+]_o$  was nearly halved in locusts after 4 h of anoxia going from  $73.3\pm3.5$  to  $37.5\pm2.8$  mM, and  $[\text{K}^+]_o$  increased more than five-fold from  $7.8\pm0.5$  to  $41.2\pm1.6$  mM after 4 hours under anoxia.

During recovery from 2 hours of anoxia,  $[\text{Na}^+]_i$  showed a tendency for recovery towards control values (Fig. 3A;  $F_{5,49}=2.58$ ,  $P=0.039$ ), and after 30 min of recovery  $[\text{Na}^+]_i$  was no longer significantly different from controls. Curiously, we observed a significant increase in  $[\text{Na}^+]_i$  after 24 hours of recovery (corresponding to the 1560 minute mark on the x-axis). There were no clear changes in  $[\text{K}^+]_i$  during recovery (Fig. 3B;  $F_{5,49}=0.764$ ,  $P=0.58$ ). Recovery from

anoxia was associated with a substantial and fast recovery of both  $[\text{Na}^+]_o$  and  $[\text{K}^+]_o$  (Fig. 3C,D;  $F_{5,49}=14.91$ ,  $P<0.001$  for  $[\text{Na}^+]_o$ ;  $F_{5,49}=140.7$ ,  $P<0.001$  for  $[\text{K}^+]_o$ ) which returned to control values within 30 min of recovery.

### Water balance

Anoxia led to a significant decrease in hemolymph volume ( $F_{6,48}=4.163$ ,  $P=0.002$ ), which was more than halved after 4 h of anoxia (Fig. 4A). However, neither muscle ( $F_{6,9}=0.832$ ,  $P=0.551$ ; Fig. 4B) nor gut ( $F_{6,48}=1.431$ ,  $P=0.222$ ; Fig. 4C) showed significant increases in water content.

### pH balance

Exposure to anoxia induced a significant decrease in hemolymph pH ( $F_{6,54}=17.97$ ,  $P<0.001$ ; Fig. 5) and after 4 hours of anoxia pH had decreased by approximately 0.8 pH units corresponding to a ~ 6.3-fold increase in  $[\text{H}^+]_o$ . Control locusts had a hemolymph pH of ~ 7.30 which declined until a plateau was reached after 1 h of anoxia, with pH remaining stable at ~ 6.50 for the remaining exposure time.

Locusts recovering from 2 h of anoxia had a gradual and significant rise in hemolymph pH ( $F_{5,43}=35.31$ ,  $P<0.001$ ; Fig. 5). However, recovery was still in progress at 2 hours of recovery and was not recorded as fully recovered until the animals had recovered for 24 h (there were no measurements between 2 and 24h of recovery).

### Tissue damage

Exposure to 4 h of anoxia caused a significant rise in *in vivo* tissue damage which increased from 6 % to 39 % ( $F_{1,9}=7.717$ ,  $P=0.022$ ; Fig. 6A). Muscle cell death was low in control experiments (6 %) indicating that the muscle dissection had relatively small effect on cell survival.

*In vitro* experiments were designed to examine the isolated and combined effects of acidification, anoxia and hyperkalemia by placing muscle tissue in different experimental conditions. The control group was more damaged under *in vitro* (23 %) than *in vivo* conditions (6 %) (compare Fig. 6A and 6B). However, the treatments with acidification, anoxia and hyperkalemia clearly increased tissue damage ( $F_{4,30}=6.912$ ,  $P<0.001$ ; Fig. 6B) beyond the control values. The isolated effects on tissue damage of hyperkalemia, acidosis, and anoxia did not significantly differ from each other or from the combined effects of all three perturbations. All treatment groups had injury in 44-54 % of cells corresponding to an approximate doubling

of tissue damage compared with controls (Fig. 6B). Thus, no clear additive effects of the single variables are evident from these experiments.

## Discussion

### Anoxia causes disruption of homeostasis

The ability to survive anoxic exposures in most animals is tightly linked to their ability to match energy demand and supply at a suppressed metabolic level (Boutilier, 2001; Hochachka and Lutz, 2001). Many insects show high anoxic tolerances despite very low ATP concentrations (Campbell *et al.*, 2018), and survival in insects may therefore involve tolerating other detrimental effects that are downstream of ATP depletion. Our experiments demonstrated considerable anoxia tolerance of the migratory locust despite experiencing large physiological changes. Anoxic exposures led to a decrease in muscle ATP concentration that reached a stable plateau of 1-3 % of control levels after 2 hours of anoxia (Fig. 2). This response is consistent with previous studies on insects (Wegener, 1993; Weyel and Wegener, 1996; Campbell *et al.*, 2018) and the stability of a low but non-zero ATP tissue concentration could indicate a regulated ATP-homeostasis (Boutilier, 2001, Campbell *et al.*, 2018). Entering coma when exposed to environmental stressors such as anoxia can in some respects be considered an adaptive mechanism as this coma decreases energy demand (Rodgers-Garlick *et al.*, 2011). Energy production of the hypometabolic locusts is seemingly supported by anaerobic metabolism in *L. migratoria* as indicated by the hemolymph pH decrease of ~ 0.8 units within the first 2 h of anoxia (Fig. 5). This acidification is probably caused by acidic waste products from anaerobic metabolism and a similar decrease of 1 pH unit was recently observed by Campbell *et al.* (2018) in *D. melanogaster* after 2 hours of anoxia at 25 °C. The pH plateau observed after 2-4 h of anoxia could indicate depletion of anaerobic substrate or be a consequence of depressed ATP turnover following cellular death as many of the animals died and were injured during this time interval (Fig. 1). Clearly, ATP production by anaerobic pathways was not sufficient to sustain ATP, ion or water balance, as all these parameters changed substantially during anoxia (Fig. 2, 3 and 4).

The reduction of energy state likely disrupted ion homeostasis through a decreased activity of ion-motive ATPases leading to a 5-fold increase in  $[K^+]_o$  (Fig. 3D), a 2-fold decrease in  $[Na^+]_o$  (Fig. 3C) as well as a 2-fold decrease in hemolymph volume (Fig. 4A). Water and ion balance are tightly linked, and conservation of hemolymph volume requires active reabsorption of water and ions to balance the passive leakage (Gerber and Overgaard, 2018).



The large increase in hemolymph  $[K^+]_o$  observed in our experiments are similar to previous studies in *Drosophila* (Campbell *et al.*, 2018). This increase in  $[K^+]_o$  could not be ascribed to intracellular leakage from muscle cells as these had a nearly constant  $[K^+]_i$  (Fig. 3B) and water volume (Fig. 4B). Part of the increase in  $[K^+]_o$  is linked to a decrease in hemolymph volume (Fig. 4A) which concentrates  $K^+$  ions and this effect is quite similar to that found in many insects exposed to low temperature (MacMillan and Sinclair, 2011; Košťál *et al.*, 2004). The reduction in hemolymph volume can, however, not explain the 5-fold increase in  $[K^+]_o$  as the hemolymph volume was only halved. Another possible source for the increased  $K^+$  could be a leakage from the guts, but this was not tested in the present study. Nevertheless, there is a strong  $K^+$  gradient from both the midgut and the hindgut towards the hemolymph (Dow, 1981), suggesting that inhibition of ATPases in the gut and Malpighian tubule may lead to part of the rise in  $[K^+]_o$ . Interestingly, the decrease in hemolymph water content could not be explained by water movements towards muscle tissue and gut lumen as these only showed small and non-significant increases during anoxia. The loss of hemolymph volume may therefore involve regurgitation or urination or possibly water is relocated to other tissues.

The increase in  $[K^+]_o$  in locust hemolymph is qualitatively similar to the fast anoxic  $[K^+]_o$  surges that have been observed in the brains of locusts (Rodgers *et al.*, 2007; Armstrong *et al.*, 2009) and *Drosophila* (Armstrong *et al.*, 2011). These surges occur much faster in the CNS where the extracellular space is very small, and the  $[K^+]_o$  surges cause rapid depolarization within the CNS that lead to coma (Rodgers *et al.*, 2010). Thus, chronic depolarization of either neuronal or muscular tissue will result in a loss of excitability (Hosler *et al.*, 2000; Rodgers *et al.*, 2010) and because these events occur much faster in the CNS it seems clear that depolarization of neurons during anoxia are the initiating cause of anoxic coma (Hosler *et al.*, 2000; Rodgers *et al.*, 2010; Hou *et al.*, 2014). Depolarization caused by hyperkalemia may also cause cell injury and it is therefore plausible that anoxic damage is partially linked to the massive increase in  $[K^+]_o$  that develops during anoxia (see also discussion below).

For  $Na^+$ , we observed that  $[Na^+]_i$  increased by ~ 5-8 mM (Fig. 3A) and  $[Na^+]_o$  decreased substantially (~ 40 mM) (Fig. 3C) during anoxia. This suggests that some of the extracellular  $Na^+$  leaked into the muscle cells. Hemolymph volume is substantially smaller than intracellular water volume (Harrison, 1989), so a smaller increase in intracellular  $Na^+$  is expected when  $Na^+$  moves from hemolymph to cytoplasm. MacMillan and Sinclair (2011), MacMillan *et al.* (2015b) and Gerber and Overgaard (2018) investigated ion and water balance in *Drosophila*, *Gryllus* and *Locusta* during cold exposure where activity of ion motive ATPases are also reduced. These studies found that a cold induced reduction in  $Na^+$  reabsorption led to a passive



transport of  $\text{Na}^+$  from hemolymph to the guts (and possibly also to other tissues) and these studies suggested that hemolymph water would follow  $\text{Na}^+$  osmotically. A similar process is likely to occur also in locusts during anoxia as there is a strong gradient for  $\text{Na}^+$  diffusion from hemolymph towards the gut lumen (Dow, 1981). We can therefore conclude that prolonged anoxia leads to massive perturbations of extracellular ion and water balance, but also that further studies are needed to describe the exact nature of these ion and water movements.

### **Anoxic tissue damage**

Prolonged anoxic bouts lead to cell damage and eventually death. This was also observed in the present study where anoxic exposure caused cellular injury *in vivo* and *in vitro* (Fig. 6). We hypothesized that injury would be caused by the additive effects of anoxia, acidosis and hyperkalemia, however, to our surprise, we found that each of these isolated factors caused the same level of injury as when they were combined (also discussed below). In theory, a lack of ATP can lead to cell damage via the associated effects linked to hyperkalemia and acidosis. High  $[\text{K}^+]_o$  causes depolarization of cell membranes, and a sufficiently large depolarization activate voltage-dependent  $\text{Ca}^{2+}$  channels, creating a large  $\text{Ca}^{2+}$  influx into the cells (Hochachka, 1986; Boutilier, 2001; Bayley *et al.*, 2018). The ensuing increase in  $[\text{Ca}^{2+}]_i$  may then lead to activation of  $\text{Ca}^{2+}$ -dependent phospholipases and proteases that cause cell damage and death (Hochachka, 1986; Boutilier, 2001, Bayley *et al.*, 2018). The challenges of defending membrane potential during anoxia are therefore very similar to those experienced by cold exposed insects since both anoxia and hypothermia causes hyperkalemia (Overgaard and MacMillan, 2017). Furthermore, both cold and anoxia will also reduce the activity of electrogenic ion-pumps (e.g. the  $\text{Na}^+/\text{K}^+$ -ATPase) that contribute considerably to insect membrane potential (Huddard and Wood, 1966; Rheuben, 1972). It is therefore likely that part of the cellular injury observed is linked to the gradual accumulation of  $[\text{K}^+]$ , but as evident from Fig. 6B there are also other factors that contribute to cell injury.

Acid-base status has been shown to impact many behavioral and physiological aspects in insects (Harrison, 2001), and low pH-values have been demonstrated to directly impact insect survival (see e.g. Bell and Nebeker, 1969; Bell, 1971). All proteins have pH-optima for activity and stability, and a large shift to more acidic conditions can retard the proteins' normal activities – possibly resulting in cell damage. Further, acidosis has been shown to depolarize muscle fiber potentials in the moth *Antheraea polyphemus* (Rheuben, 1972) and the butterfly *Pieris brassicae* (Piek *et al.*, 1977). In the moth, depolarization appeared to be partly due to a

decrease in membrane resistance and therefore a decrease of the electrogenic effect (Rheuben, 1972). Thus, hemolymph acidosis might also be involved in depolarization-induced cell damage.

Besides hyperkalemia and acidosis, the lack of ATP may lead to a general loss of organismal homeostasis which potentially could result in damage (Harrison *et al.*, 2017). Damage to macromolecules, protein aggregation and unfolding of proteins during anoxia are some hypothesized causes of damage, and they are supported by the findings that accumulation of heat shock proteins and trehalose is protective during anoxic exposure of *D. melanogaster* (Chen *et al.*, 2002; Azad *et al.*, 2009). Another potential indirect effect of low ATP is depolarization of membrane potentials by elimination of the electrogenic effect (see discussion above).

In our experimental design we tried to examine if one of these physiological changes was particularly important for causing cellular damage during anoxia. Four hours of anoxia strongly increased cellular damage *in vivo* and for muscle *in vitro* (Fig. 6). Interestingly, the isolated and combined effects of hyperkalemia, acidification and anoxia were equally injuring, and no single variable therefore seemed to cause most of the injury, and no additive effects of the variables were apparent. These results cautiously suggest that all three factors might be capable of triggering the same downstream process of injury, and that each of these perturbations is capable of doing so in isolation. However, further experiments are needed to verify this idea and it would also be interesting to examine to what extent the injury observed is linked to oxidative damage during re-oxygenation when reactive oxygen species are formed. For example it has been shown that hypoxia can induce modulations of the antioxidant defense system (Hermes-Lima *et al.*, 2015) although this activation of defense systems is generally weaker in response to hypoxia/anoxia than it is towards other environmental stressors such as estivation, dehydration and freezing (Moreia *et al.*, 2016).

### **Anoxic recovery**

Locusts can physiologically and behaviorally recover surprisingly well after anoxia – if the anoxic bouts are not too long. Thus, locusts were able to completely recover their disrupted ATP, ion and pH balance after a 2 h anoxic exposure, but the time courses of recovery varied dramatically among parameters. Muscle ATP was fully recovered after 15 min (Fig. 2), hemolymph  $[K^+]_o$  and  $[Na^+]_o$  followed shortly after and was fully recovered after 30 min (Fig. 3C,D) and hemolymph pH required 24 h to return to control values (Fig. 2, 3 and 5). The rapid

recovery of ATP levels matches findings in previous studies on insects including *L. migratoria*, and it has previously been ascribed to a low degradation of adenylates such that AMP accumulates during anoxia (Wegener, 1993; Weyel and Wegener, 1996). The maintenance of a large adenylate pool is unlike most mammalian tissues (where AMP is further catabolized), and it allows insects, once re-exposed to normoxia, to rapidly re-synthesize the ATP in order to restore cellular functions and recover from the coma (Weyel and Wegener, 1996). The observation that ion balance recovered slower than ATP balance supports the idea that ATP is necessary for restoring ion homeostasis through activation of ion-motive ATPases. pH balance took even longer to restore compared with ATP and ion balance, though it is unknown where in the interval between 2 and 24 h a full recovery took place. No previous studies have investigated recovery of anoxic acidosis in insects before, but the notion that pH recovery in insects takes several hours has been demonstrated before. Harrison *et al.* (1992) showed that the locust *Schistocerca gregaria* had recovered from an extracellular acidification of 0.5 pH units (3.16-fold increase in  $[H^+]_o$ ) after 8 h (but not after 4 h) at 21 °C. Although Harrison *et al.*'s experiments were done with another locust species and with half as large a  $[H^+]_o$  increase, it shows that pH regulation happens at a time scale that is much slower than recovery of ATP and ion homeostasis.

Interestingly, ATP and ion recovery happened faster than a behavioral recovery (defined as time to standing) which took ~ 87 min (Fig. 1A), while a complete pH recovery did not happen until after behavioral recovery. Consequently, a complete recovery of ATP,  $[K^+]_o$  and  $[Na^+]_o$  is not sufficient for behavioral recovery and a complete recovery of pH is not necessary for behavioral recovery. Further, ATP recovery happens before locusts made their first movements (~ 29 min; Fig. 1A) while both  $[K^+]_o$  and  $[Na^+]_o$  recovery matches this time well. This indicates that recovered ion gradients ( $[K^+]$  in particular) is the determining factor in awakening from the coma. As previous studies have shown that even larger anoxic  $[K^+]_o$  surges in locust and *Drosophila* CNS are recovered much quicker (within few minutes) than the recovery observed in locusts in our experiments (Rodgers *et al.*, 2007; Armstrong *et al.*, 2011), this suggests that recovered ion homeostasis in muscle tissues is the determining factor in coma awakening which has also been observed to be a limiting factor for insects recovering from cold (MacMillan *et al.*, 2012; Findsen *et al.*, 2014).

## Conclusions

In the present study we show that locusts can survive several hours of anoxia at 30 °C, although their performance worsens with longer anoxic bouts. Anoxic exposures cause gradual but dramatic disruption of ATP, ion, water and pH homeostasis all of which are able to induce considerable cellular damage. Recovery of movement following anoxia was only observed after both ATP and ion balance was recovered but animals returned to a standing position before pH balance was recovered. We were unable to identify a single parameter (hyperkalemia, acidosis or anoxia) as the primary cause of cellular damage but showed that all these perturbations can cause cell injury in isolation. The absence of additive effects could indicate that some of the perturbations are acting through similar pathways (e.g. cellular depolarization) that are fully activated both with a single or the combined perturbation. However, further experiments are needed to verify this suggestion.

## Acknowledgements

We thank Kirsten Kromand for technical assistance and Danish research council (DFF-FNU) for financial support.

## Competing interest

The authors declare no competing or financial interest.

## References

- Armstrong, G. A. B., Rodgers, C. I., Money, T. G. A. and Robertson, R. M.** (2009). Suppression of spreading depression-like events in locusts by inhibition of the NO/cGMP/PKG pathway. *Journal of Neuroscience*. **29**, 8225–8235.
- Armstrong, G. A. B., Xiao, C., Krill, J. L., Seroude, L., Dawson-Scully, K. and Robertson, R. M.** (2011). Glial Hsp70 Protects K<sup>+</sup> Homeostasis in the *Drosophila* Brain during Repetitive Anoxic Depolarization. *PLoS ONE*. **6**, e28994.
- Azad, P., Zhou, D., Russo, E. and Haddad, G. G.** (2009). Distinct Mechanisms Underlying Tolerance to Intermittent and Constant Hypoxia in *Drosophila melanogaster*. *PLoS ONE*. **4**, e5371.
- Bayley, J. S., Winther, C. B., Andersen, M. K., Grønkjær, C., Nielsen, O. B., Pedersen, T. H., Overgaard, J.** (2018). Cold exposure causes cell death by depolarization-mediated Ca<sup>2+</sup> overload in a chill-susceptible insect. *Proceedings of the National Academy of Sciences of the United States of America*. **115**, E9737–E9744.
- Bell, H. L.** (1971). Effect of low pH on the survival and emergence of aquatic insects. *Water Research*. **5**, 313–319.
- Bell, H. L. and Nebeker, A. V** (1969). Preliminary Studies on the Tolerance of Aquatic Insects to Low pH. *Journal of the Kansas Entomological Society*. **42**, 230–236.
- Bergamini, C., Gambetti, S., Dondi, A. and Cervellati, C.** (2004). Oxygen, Reactive Oxygen Species and Tissue Damage. *Current Pharmaceutical Design*. **10**, 1611–1626.
- Bickler, P. E. and Buck, L. T.** (2007). Hypoxia Tolerance in Reptiles, Amphibians, and Fishes: Life with Variable Oxygen Availability. *Annual Review of Physiology*. **69**, 145–170.
- Bortner, C. D., Gómez-Angelats, M. and Cidlowski, J. A.** (2001). Plasma Membrane Depolarization without Repolarization Is an Early Molecular Event in Anti-Fas-induced Apoptosis. *Journal of Biological Chemistry*. **276**, 4304–4314.
- Boutillier, R. G.** (2001). Mechanisms of cell survival in hypoxia and hypothermia. *Journal of Experimental Biology*. **204**, 3171–3181.
- von Brand, T.** (1946). *Anaerobiosis in invertebrates* (ed. B. J. Luyet). Biodynamica Monographs Vol 4, Normandy.
- Callier, V., Hand, S. C., Campbell, J. B., Biddulph, T. and Harrison, J. F.** (2015). Developmental changes in hypoxic exposure and responses to anoxia in *Drosophila melanogaster*. *Journal of Experimental Biology*. **218**, 2927–2934.
- Campbell, J. B., Andersen, M. K., Overgaard, J. and Harrison, J. F.** (2018). Paralytic hypo-energetic state facilitates anoxia tolerance despite ionic imbalance in adult *Drosophila melanogaster*. *Journal of Experimental Biology*. **221**, jeb177147.
- Chen, Q., Enbo, M. A., Behar, K. L., Xu, T. and Haddad, G. G.** (2002). Role of trehalose phosphate synthase in anoxia tolerance and development in *Drosophila melanogaster*. *Journal of Biological Chemistry*. **277**, 3274–3279.
- Dow, J. A. T.** (1981). Ion and water transport in locust alimentary canal: Evidence from *in vivo*. *Journal of Experimental Biology*. **93**, 167–179.

- Findsen, A., Pedersen, T. H., Petersen, A. G., Nielsen, O. B. and Overgaard J.** (2014). Why do insects enter and recover from chill coma? Low temperature and high extracellular potassium compromise muscle function in *Locusta migratoria*. *Journal of Experimental Biology*. **217**, 1297-1306.
- Gerber, L. and Overgaard, J.** (2018). Cold tolerance is linked to osmoregulatory function of the hindgut in *Locusta migratoria*. *Journal of Experimental Biology*. **221**, jeb173930.
- Harrison, J. F.** (2001). Insect Acid-Base Physiology. *Annual Review of Entomology*. **46**, 221–250.
- Harrison, J. F., Wong, C. J. H. and Phillips, J. E.** (1992). Recovery from Acute Haemolymph Acidosis in Unfed Locusts: I. Acid Transfer to the Alimentary Lumen is the Dominant Mechanism. *Journal of Experimental Biology*. **165**, 85–96.
- Harrison, J. F., Greenlee, K. J. and Verberk, W. C. E. P.** (2017). Functional hypoxia in insects: Definition, assessment, and consequences for physiology, ecology and evolution. *Annual Review of Entomology*. **63**, 303–325.
- Harrison, J. M.** (1989). Temperature effects on intra-and extracellular acid-base status in the American locust, *Schistocerca nitens*. *Journal of Comparative Physiology B*. **158**, 763–770.
- Hermes-Lima, M., Moreira, D.C., Rivera-Ingraham, G.A., Giraud-Billoud, M., Genaro-Mattos, T.C. and Campos, É.G.** (2015) Preparation for oxidative stress under hypoxia and metabolic depression: Revisiting the proposal two decades later. *Free Radical Biology and Medicine*. **89**, 1122-1143.
- Hoback, W. W.** (2012). Ecological and experimental exposure of insects to anoxia reveals surprising tolerance. In *Anoxia: Evidence for Eukaryote Survival and Paleontological Strategies* (ed. A. Altenbach, J. M. Bernhard, and J. Seckbach), pp. 167-188. New York, NY, USA: Springer.
- Hoback, W. W. and Stanley, D. W.** (2001). Insects in hypoxia. *Journal of Insect Physiology*. **47**, 533–542.
- Hochachka, P. W.** (1986). Metabolic arrest. *Intensive Care Medicine*. **12**, 127–133.
- Hochachka, P. W. and Lutz, P. L.** (2001). Mechanism, origin, and evolution of anoxia tolerance in animals. *Comparative Biochemistry and Physiology B*. **130**, 435–459.
- Hosler, J. S., Burns, J. E. and Esch, H. E.** (2000). Flight muscle resting potential and species-specific differences in chill-coma. *Journal of Insect Physiology*. **46**, 621–627.
- Hou, N., Armstrong, G. A. B., Chakraborty-Chatterjee, M., Sokolowski, M. B. and Robertson, R. M.** (2014). Na<sup>+</sup>/K<sup>+</sup>-ATPase trafficking induced by heat shock pretreatment correlates with increased resistance to anoxia in locusts. *Journal of Neurophysiology*. **112**, 814–823.
- Huddart, H. and Wood, D. W.** (1966). The effect of DNP on the resting potential and ionic content of some insect skeletal muscle fibres. *Comparative Biochemistry and Physiology*. **18**, 681–688.
- Jackson, D. C.** (2002). Hibernating without oxygen: Physiological adaptations of the painted turtle. *Journal of Physiology*. **543**, 731–737.



- Jetté, M., Sidney, K. and Blümchen, G.** (1990). Metabolic equivalents (METS) in exercise testing, exercise prescription, and evaluation of functional capacity. *Clinical Cardiology*. **13**, 555–565.
- Košťál, V., Vambera, J. & Bastl, J.** (2004). On the nature of pre-freeze mortality in insects: water balance, ion homeostasis and energy charge in the adults of *Pyrrhocoris apterus*. *Journal of Experimental Biology*. **207**, 1509–1521.
- Krogh, A. and Weis-Fogh, T.** (1951). The respiratory exchange of the desert locust (*Schistocerca gregaria*) before, during and after flight. *Journal of Experimental Biology*. **28**, 344–357.
- Lee, S. K., Boron, W. F. and Parker, M. D.** (2013). Monitoring ion activities in and around cells using ion-selective liquid-membrane microelectrodes. *Sensors*. **13**, 984–1003.
- Lighton, J. R. B. and Schilman, P. E.** (2007). Oxygen reperfusion damage in an insect. *PLoS ONE*. **2**, e1267.
- Lutz, P. L. and Nilsson, G. E.** (1997). *The Brain Without Oxygen*. Austin, TX, USA: Chapman & Hall.
- MacMillan, H. A. and Sinclair, B. J.** (2011). The role of the gut in insect chilling injury: cold-induced disruption of osmoregulation in the fall field cricket, *Gryllus pennsylvanicus*. *Journal of Experimental Biology*. **214**, 726–734.
- MacMillan, H. A., Williams, C. M., Staples, J. F. and Sinclair, B. J.** (2012). Reestablishment of ion homeostasis during chill-coma recovery in the cricket *Gryllus pennsylvanicus*. *Proceedings of the National Academy of Sciences of the United States of America*. **109**, 20750–20755.
- MacMillan, H., Baatrup, E. and Overgaard, J.** (2015a). Concurrent effects of cold and hyperkalaemia cause insect chilling injury. *Proceedings of the Royal Society B*. **282**, 20151483.
- MacMillan, H. A., Andersen, J. L., Davies, S. A. and Overgaard, J.** (2015b). The capacity to maintain ion and water homeostasis underlies interspecific variation in *Drosophila* cold tolerance. *Scientific Reports*. **5**, 18607.
- Moratzky, T., Burkhardt, G., Weyel, W. and Wegener, G.** (1993). Metabolic rate and tolerance of anoxia: microcalorimetric and biochemical studies on vertebrates and insects. *Thermochimica Acta*. **229**, 193–204.
- Moreira, D.C., Venancio, L.P.R., Sabino, M.A.C.T. and Hermes-Lima, M.** (2016). How widespread is preparation for oxidative stress in the animal kingdom? *Comparative Biochemistry and Physiology*. **200**, 64–78.
- O’Sullivan, J. D. B., MacMillan, H. A. and Overgaard, J.** (2017). Heat stress is associated with disruption of ion balance in the migratory locust, *Locusta migratoria*. *Journal of Thermal Biology*. **68**, 177–185.
- Overgaard, J. and MacMillan, H. A.** (2017). The Integrative Physiology of Insect Chill Tolerance. *Annual Review of Physiology*. **79**, 187–208.



- Piek, T., Mantel, P. and Wijsman, J. P. M.** (1977). Effects of monocarboxylates and external pH on some parameters of insect muscle fibres. *Journal of Insect Physiology*. **23**, 773–777.
- Rheuben, M. B.** (1972). The resting potential of moth muscle fibre. *Journal of Physiology*. **225**, 529–554.
- Rodgers-Garlick, C. I., Armstrong, G. A. B. and Robertson, R. M.** (2011). Metabolic Stress Modulates Motor Patterning via AMP-Activated Protein Kinase. *Journal of Neuroscience*. **31**, 3207–3216.
- Rodgers, C. I., Armstrong, G. A. B., Shoemaker, K. L., LaBrie, J. D., Moyes, C. D. and Robertson, R. M.** (2007). Stress Preconditioning of Spreading Depression in the Locust CNS. *PLoS ONE*. **2**, e1366.
- Rodgers, C. I., Armstrong, G. A. B. and Robertson, R. M.** (2010). Coma in response to environmental stress in the locust: A model for cortical spreading depression. *Journal of Insect Physiology*. **56**, 980–990.
- Rodriguez, E. C. and Robertson, R. M.** (2012). Protective effect of hypothermia on brain potassium homeostasis during repetitive anoxia in *Drosophila melanogaster*. *Journal of Experimental Biology*. **215**, 4157–4165.
- Snodgrass, R. E.** (1929). The thoracic mechanism of a grasshopper, and its antecedents. *Smithsonian Miscellaneous Collections*. **82**, 1–111.
- Storey, K. B. and Storey, J. M.** (1990). Metabolic rate depression and biochemical adaptation in anaerobiosis, hibernation and estivation. *The Quarterly Review of Biology*. **65**, 145–174.
- Wegener, G.** (1993). Hypoxia and posthypoxic recovery in insects: physiological and metabolic aspects. In *Surviving Hypoxia: Mechanisms of Control and Adaptation* (ed. P. W. Hochachka, P. L. Lutz, T. J. Sick, M. Rosenthal and G. E. E. J. M van den Thillart), pp. 417–434. Boca Raton, FL: CRC Press.
- Wegener, G. and Moratzky, T.** (1995). Hypoxia and anoxia in insects: microcalorimetric studies on two species (*Locusta migratoria* and *Manduca sexta*) showing different degrees of anoxia tolerance. *Thermochimica Acta*. **251**, 209–218.
- Weyel, W. and Wegener, G.** (1996). Adenine nucleotide metabolism during anoxia and postanoxic recovery in insects. *Experientia*. **52**, 474–480.
- Wu, B. S., Lee, J. K., Thompson, K. M., Walker, V. K., Moyes, C. D. and Robertson, R. M.** (2002). Anoxia induces thermotolerance in the locust flight system. *Journal of Experimental Biology*. **205**, 815–827.
- Yi, S.-X. and Lee, R. E.** (2003). Detecting freeze injury and seasonal cold-hardening of cells and tissues in the gall fly larvae, *Eurosta solidaginis* (Diptera: Tephritidae) using fluorescent vital dyes. *Journal of Insect Physiology*. **49**, 999–1004.

## Tables

**Table 1.** Buffer pH-values, contents in mM (besides 3 CaCl<sub>2</sub>, 2 MgCl<sub>2</sub>, 1 NaH<sub>2</sub>PO<sub>4</sub>, 90 sucrose, 5 glucose, 5 trehalose, 1 proline, 10 MOPS), and type of gas-supply.

| Treatment        | pH  | NaCl | KCl | O <sub>2</sub> /N <sub>2</sub> |
|------------------|-----|------|-----|--------------------------------|
| <i>In vivo</i>   |     |      |     |                                |
| Control          | 7.3 | 110  | 8   | O <sub>2</sub>                 |
| Anoxia           | 6.5 | 78   | 40  | N <sub>2</sub>                 |
| <i>In vitro</i>  |     |      |     |                                |
| Control          | 7.3 | 110  | 8   | O <sub>2</sub>                 |
| Combined effects | 6.5 | 78   | 40  | N <sub>2</sub>                 |
| Anoxia           | 7.3 | 110  | 8   | N <sub>2</sub>                 |
| Hyperkalemia     | 7.3 | 78   | 40  | O <sub>2</sub>                 |
| Acidosis         | 6.5 | 110  | 8   | O <sub>2</sub>                 |

## Figures

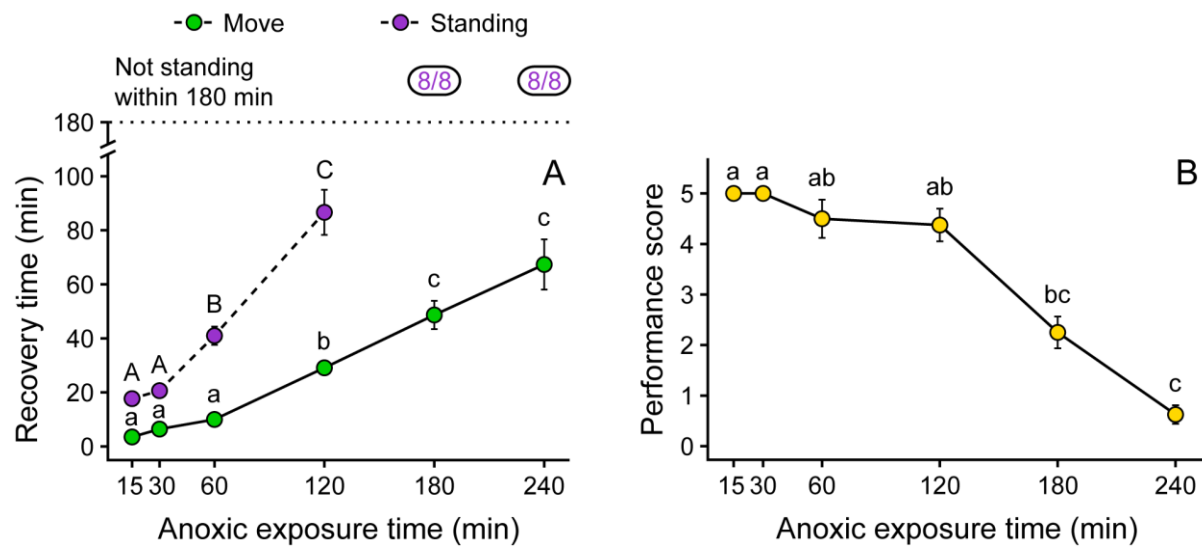

**Figure 1.** Recovery after anoxic coma in *L. migratoria*. (A) Recovery time measured as the time to first movement (green with solid lines) and time to standing (purple with dashed lines) after different durations of anoxic exposure. Anoxia was carried out at 30 °C and recovery at 20-22 °C. Numbers above the dotted line indicate the number of locusts that did not stand within 180 min. N=8 locusts per sample point. Dissimilar lowercase letters indicate differences in means within green points (time to move), and dissimilar capital letters indicate differences in means within purple points (time to stand) (Tukey's HSD). (B) Performance score in *L. migratoria* 24 h after different durations of anoxic exposure. The first 3 h of the recovery period was carried out at 20-22 °C followed by 21 h at 30 °C. Estimation of performance was achieved with a performance score ranging from 0-5 (0 = no observable movements, 1 = any observable movement, 2 = capable to stand, 3 = capable to walk, 4 = capable to jump, and 5 = capable to fly). Dissimilar letters indicate differences in means (kruskalmc test). All values are means  $\pm$  s.e.m. (non-visible error bars are obstructed by symbols).

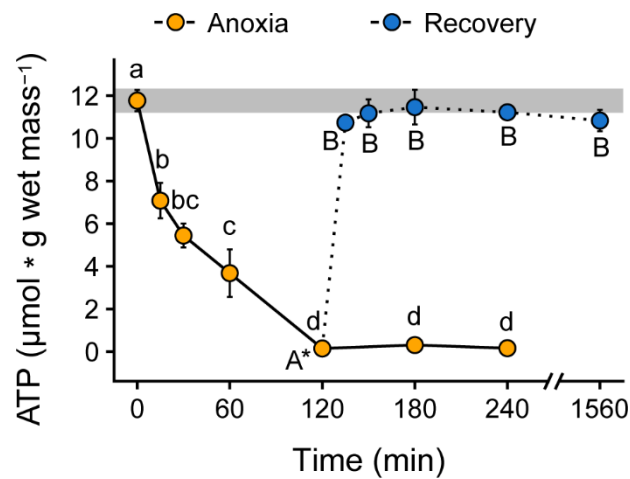

**Figure 2.** Muscle ATP of *L. migratoria* that were either exposed to anoxia for different durations (orange) or were recovering from a 2 h anoxic exposure for different durations in normoxia (blue). Note the break on the x-axis allowing inclusion of the 1560 min point (24 h). The grey area depicts values of control locusts as means  $\pm$  s.e.m. Asterisks (\*) indicate that a recovery value is significantly different from the non-anoxic control locusts (grey area) (Dunnett's test). Dissimilar lowercase letters indicate differences in means within orange points (anoxic exposure), and dissimilar capital letters indicate differences in means within blue points (anoxic recovery) (Tukey's HSD). N=5-6 locusts per sample point. All values are means  $\pm$  s.e.m. (non-visible error bars are obstructed by symbols).

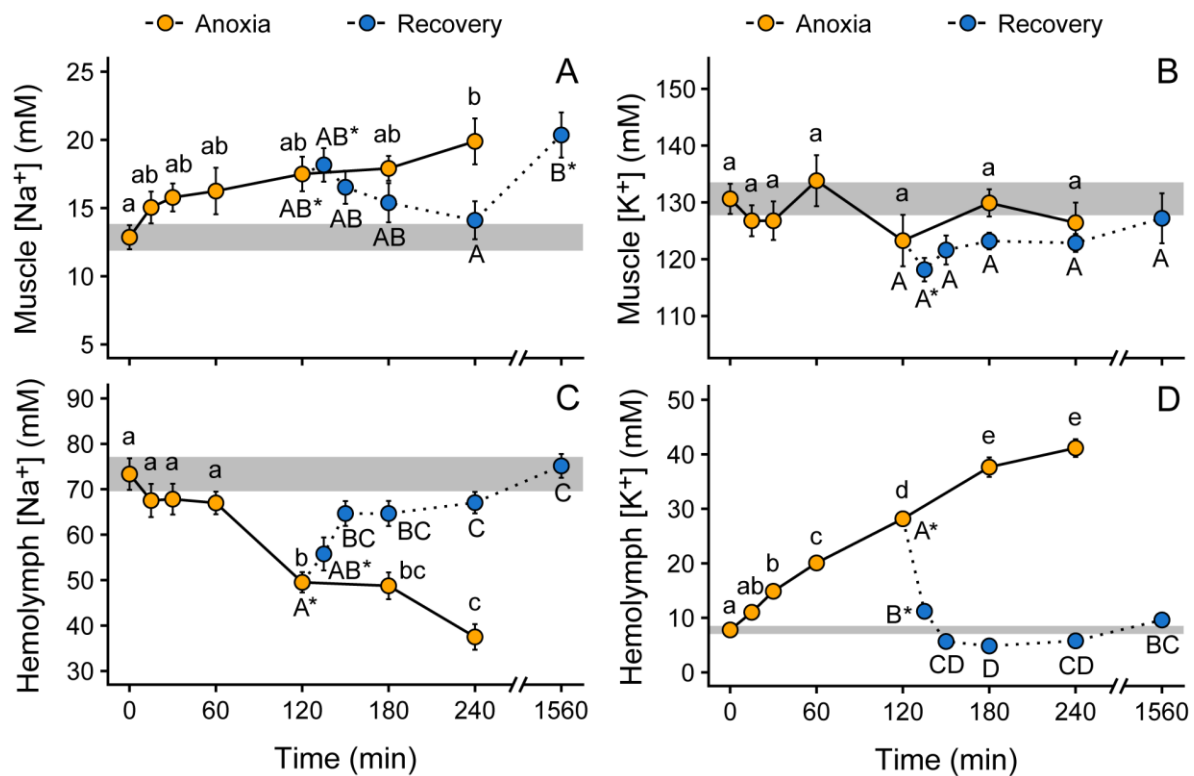

**Figure 3.** Concentrations of Na<sup>+</sup> and K<sup>+</sup> in femur muscle tissue (A,B) and hemolymph (C,D) of *L. migratoria* that were either exposed to anoxia for different durations (orange) or were recovering from a 2 h anoxic exposure for different durations in normoxia (blue). Note the break on the x-axis allowing inclusion of the 1560 min point (24 h). Grey areas depict values of control locusts as means  $\pm$  s.e.m. Asterisks (\*) indicate that a recovery value is significantly different from the non-anoxic control locusts (grey area) (Dunnnett's test). Dissimilar lowercase letters indicate differences in means within orange points (anoxic exposure), and dissimilar capital letters indicate differences in means within blue points (anoxic recovery) (Tukey's HSD). N=7-8 locusts per sample point. All values are means  $\pm$  s.e.m. (non-visible error bars are obstructed by symbols).

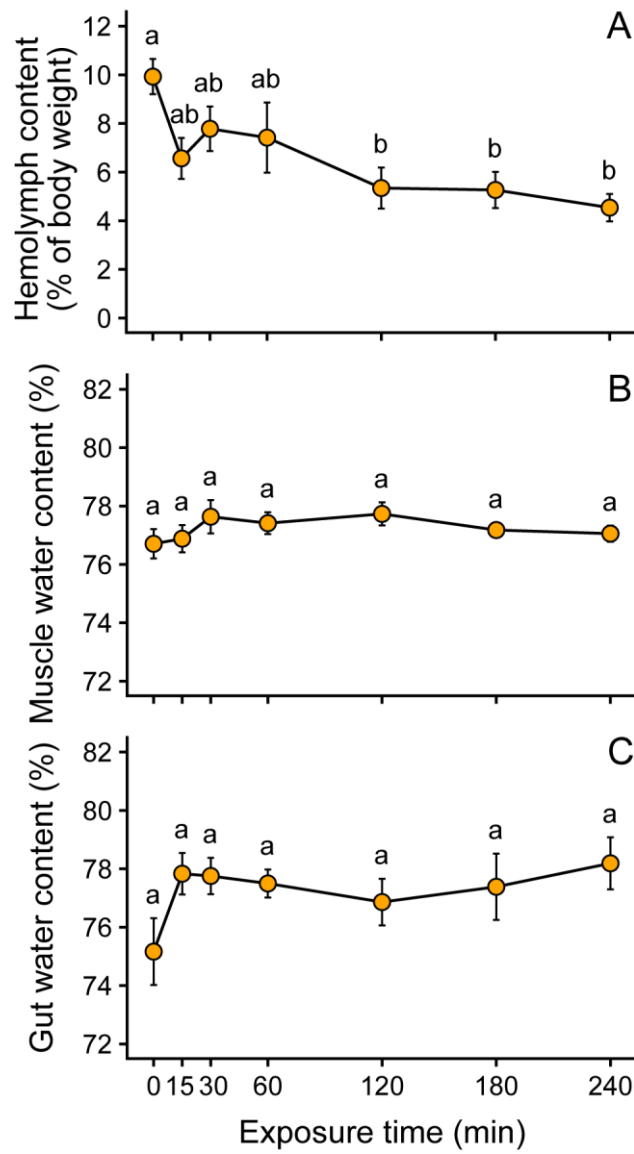

**Figure 4.** Water balance in hemolymph (A), femur muscle tissue (B), and gut (C) of *L. migratoria* after anoxic exposures for different durations at 30 °C. Dissimilar letters indicate differences in means (Tukey's HSD). N=7-8 locusts per sample point. All values are means  $\pm$  s.e.m. (non-visible error bars are obstructed by symbols).

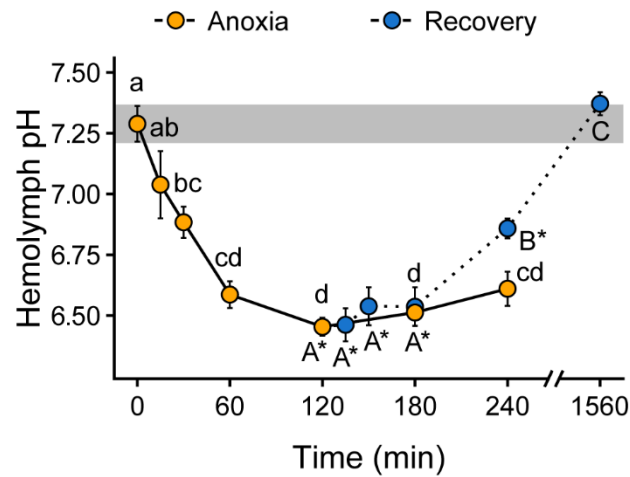

**Figure 5.** Hemolymph pH of *L. migratoria* that were either exposed to anoxia for different durations (orange) or were recovering from a 2 h anoxic exposure for different durations in normoxia (blue). Note the break on the x-axis allowing inclusion of the 1560 min point (24 h). The grey area depicts values of control locusts as means  $\pm$  s.e.m. Asterisks (\*) indicate that a recovery value is significantly different from the non-anoxic control locusts (grey area) (Dunnett's test). Dissimilar lowercase letters indicate differences in means within orange points (anoxic exposure), and dissimilar capital letters indicate differences in means within blue points (anoxic recovery) (Tukey's HSD). N=8-10 locusts per sample point. All values are means  $\pm$  s.e.m. (non-visible error bars are obstructed by symbols).



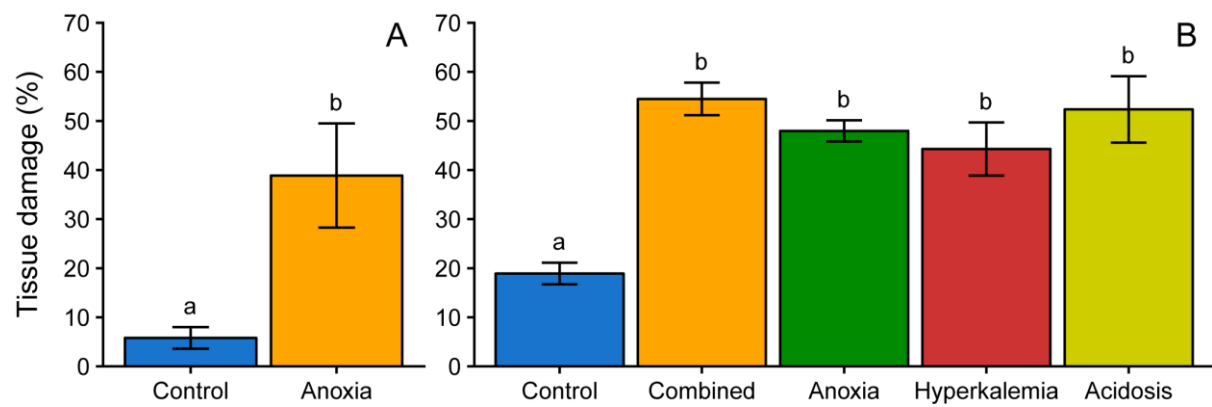

**Figure 6.** Muscle tissue damage of *L. migratoria*. (a) *In vivo* muscle tissue damage of intact locusts. Treatments: controls (blue) or exposure to anoxia for 4 h (orange). N=5-6 locusts per treatment. Dissimilar letters above bars indicate differences in means (ANOVA). (b) *In vitro* muscle tissue damage of semi-intact locusts treated for 4 h. Treatments: controls (blue), exposure to anoxia only (green), hyperkalemia only (red), acidosis only (yellow), or all three combined (orange). N=6-8 locusts per treatment. Dissimilar letters above bars indicate differences in means (Tukey's HSD). All values are means  $\pm$  s.e.m.
